# Supplementary material for: Protein Coexpression Using FMDV 2A: Effect of “Linker” Residues
Source: Biomed Res Int. 2013 Jun 12;2013:291730. doi: 10.1155/2013/291730 (PMC3710640; doi:10.1155/2013/291730)
Supplement: Supplementary file 1 — Supplementary Material Table S1. Primer sequences used for introduction of mutations in parental constructs. For each mutant (1D2A25-18mut, 1D2A20Fm, 1D2A18Fm, TaV2Amut1 and mut2) two PCR products were recombined in competent JM109 cells. The first was amplified with forward primer (Fw) encoding the mutated sequence (shown in lowercase) and a reverse primer binding to the vector backbone at nt 4500 (5'-GTTCCACTGAGCGTCAGACCCCGTAG-3'). The second was amplified using a reverse primer (Rev) encoding the mutated sequence (shown in lower case) and a forward primer binding to the vector backbone at nt 4500 (5'-CTACGGGGTCTGACGCTCAGTGGAAC-3'). [file 291730.f1.docx]

| F2A25mut  Fw  Rev  F2A24mut  Fw  Rev  F2A23mut  Fw  Rev  F2A22mut  Fw  Rev  F2A21mut  Fw  Rev  F2A20mut1  Fw  Rev  F2A20mut2  Fw  Rev  F2A20mut3  Fw  Rev  F2A20Fm  Fw  Rev  F2A18mut  Fw  Rev  F2A18Fm  Fw  Rev  T2Amut1  Fw  Rev  T2Amut2  Fw  Rev | GAGCTGTATAAGATGCATGGAtccgggtctagaggagcatgcGTGGCACCGGTGAAACAGACTTTGAATTTTGCAAAATTCAAAGTCTGTTTCACCGGTGCCACgcatgctcctctagacccggaTCCATGCATCTTATACAGCTC  GAGCTGTATAAGATGCATGGAtccgggtctagaggagcatgcGCACCGGTGAAACAGACTTTGAATTTTGAC  GTCAAAATTCAAAGTCTGTTTCACCGGTGCgcatgctcctctagacccggaTCCATGCATCTTATACAGCTC  GAGCTGTATAAGATGCATGGAtccgggtctagaggagcatgcCCGGTGAAACAGACTTTGAATTTTGAC GTCAAAATTCAAAGTCTGTTTCACCGGgcatgctcctctagacccggaTCCATGCATCTTATACAGCTC  GAGCTGTATAAGATGCATGGAtccgggtctagaggagcatgcGTGAAACAGACTTTGAATTTTGACCTTC  GAAGGTCAAAATTCAAAGTCTGTTTCACgcatgctcctctagacccggaTCCATGCATCTTATACAGCTC  GAGCTGTATAAGATGCATGGAtccgggtctagaggagcatgcAAACAGACTTTGAATTTTGACCTTCTC  GAGAAGGTCAAAATTCAAAGTCTGTTTgcatgctcctctagacccggaTCCATGCATCTTATACAGCTC  GAGCTGTATAAGATGCATGGAtccgggtctagaTCTCTCGAGCAGACTTTGAATTTTG  CAAAATTCAAAGTCTGCTCGAGAGAtctagacccggaTCCATGCATCTTATACAGCTC  ATGCATGGACGTGCAAAGCGTggagcatgcCAGACTTTGAATTTTGACCTTCTC  GAGAAGGTCAAAATTCAAAGTCTGgcatgctccACGCTTTGCACGTCCATGCATC  GAGCTGTATAAGATGCATGGAtccgggtctagaggagcatgcCAGACTTTGAATTTTGACCTTCTC  GAGAAGGTCAAAATTCAAAGTCTGgcatgctcctctagacccggaTCCATGCATCTTATACAGCTC  CGAGCTGTATAAGATGCATGGAgctgcaaaggctTCTCTCGAGCAGACTTTGAATTTTGAC  CAAAATTCAAAGTCTGCTCGAGAGAagcctttgcagcTCCATGCATCTTATAC  GAGCTGTATAAGATGCATGGAtccgggtctagaggagcatgcTTGAATTTTGACCTTCTCAAGTTGGCG  CGCCAACTTGAGAAGGTCAAAATTCAAgcatgctcctctagacccggaTCCATGCATCTTATACAGCTC    CGAGCTGTATAAGATGCATGGAgctgcaaaggctTCTCTCGAGTTGAATTTTGACCTTCTC  GAAGGTCAAAATTCAACTCGAGAGAagcctttgcagcTCCATGCATCTTATAC  CTCGGCATGGACGAGCTGTATAAGATGCATTCTAGAagcttagagGAGGGCAGGGGAAGTCTTCTAACATCATGTTAGAAGACTTCCCCTGCCCTCctctaagctTCTAGAATGCATCTTATACAGCTCGTCCATGCCGAG  CTCGGCATGGACGAGCTGTATAAGagggctaagAGAagcttagagGAGGGCAGGGGAAGTCTTCTAACATG  CATGTTAGAAGACTTCCCCTGCCCTCctctaagctTCTcttagccctCTTATACAGCTCGTCCATGCCGAG |
| --- | --- |

**Table S1. Primer sequences used for introduction of amino acid substitutions in parental pGFP-2A-CherryFP constructs.** Mutated nucleotides are shown in lowercase
